# Supplementary material for: The smallest near-infrared fluorescence complementation system for imaging protein–protein and RNA–protein interactions
Source: Royal Society of Chemistry journal article supplement (doi:10.1039/d1sc04839b), 2021-12-25
Supplement: d1sc04839b1.pdf [file d1sc04839b1.pdf]

## Supporting Information

### **The smallest near-infrared fluorescence complementation system for imaging protein-protein and RNA-protein interactions**

Minghai Chen<sup>1,\*</sup>, Chuang Yan<sup>1</sup>, Luping Zheng<sup>1</sup>, Xian-En Zhang<sup>2,3,\*</sup>

<sup>1</sup>CAS Key Laboratory of Quantitative Engineering Biology, Shenzhen Institute of Synthetic Biology, Shenzhen Institutes of Advanced Technology, Chinese Academy of Sciences, Shenzhen 518055, China

<sup>2</sup>Faculty of Synthetic Biology, Shenzhen Institutes of Advanced Technology, Chinese Academy of Sciences, Shenzhen 518055, China

<sup>3</sup>National Laboratory of Biomacromolecules, CAS Center for Excellence in Biomacromolecules, Institute of Biophysics, Chinese Academy of Sciences, Beijing 100101, China

\*Corresponding author: Xian-En Zhang, Email: zhangxe@ibp.ac.cn or Minghai Chen, Email: mh.chen1@siat.ac.cn

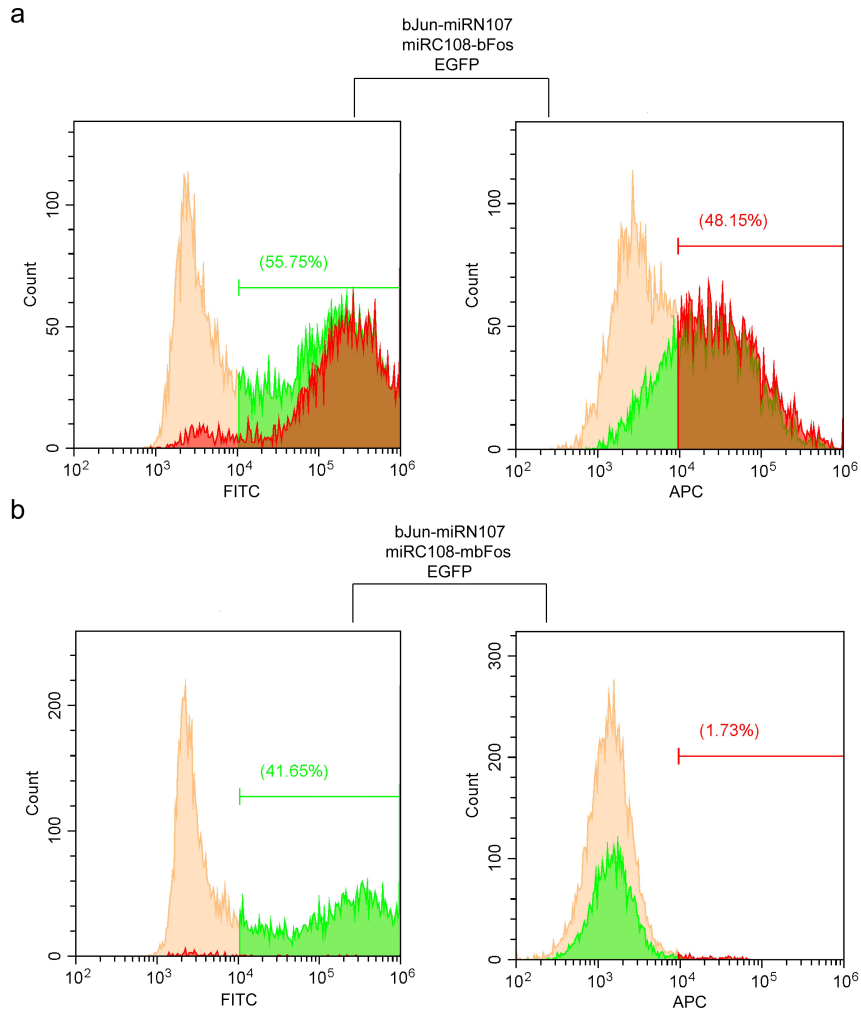

**Fig. S1.** Flow cytometry analysis was carried out to characterize the miRFP670nano-BiFC system for imaging PPIs in living cells. (a) bJun-bFos interaction was analyzed with flow cytometry in HEK 293T cells. (b) bJun-mbFos interaction was selected as the negative control and analyzed with flow cytometry in HEK 293T cells. EGFP was co-expressed in the cells as an internal control. EGFP fluorescence was detected by FITC channel and miRFP670nano fluorescence was detected by APC channel. This experiment was repeated three times.

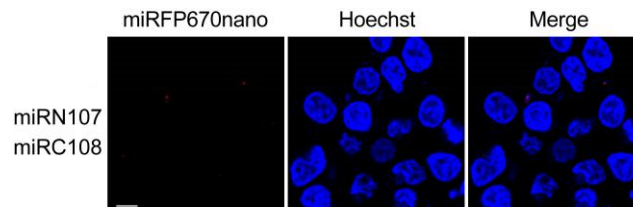

**Fig. S2.** No miRFP670nano complementary fluorescence signal was detected when co-expression of the two free miRFP670nano split fragments without fusion to the bJun-bFos heterodimer. The nuclei were stained with Hoechst 33342. Scale bar: 10  $\mu$ m

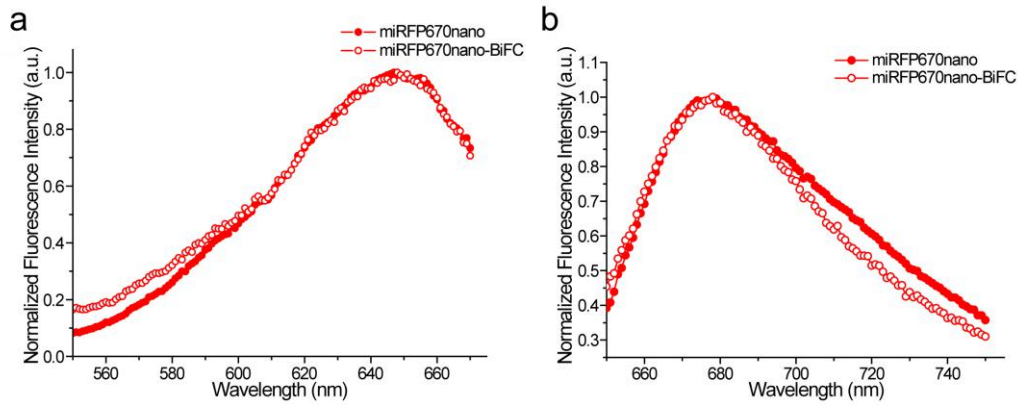

**Fig. S3.** The excitation and emission spectra of native (red filled circle) and BiFC-reconstituted (red open circle) miRFP670nano. (a) The excitation spectra of native (red filled circle) and BiFC-reconstituted (red open circle) miRFP670nano. (b) The emission spectra of native (red filled circle) and BiFC-reconstituted (red open circle) miRFP670nano. The excitation spectra of miRFP670nano were taken with emission at 700 nm and collected from 550 nm to 670 nm. The emission spectra of miRFP670nano were taken with excitation at 620 nm and collected from 650 nm to 750 nm.

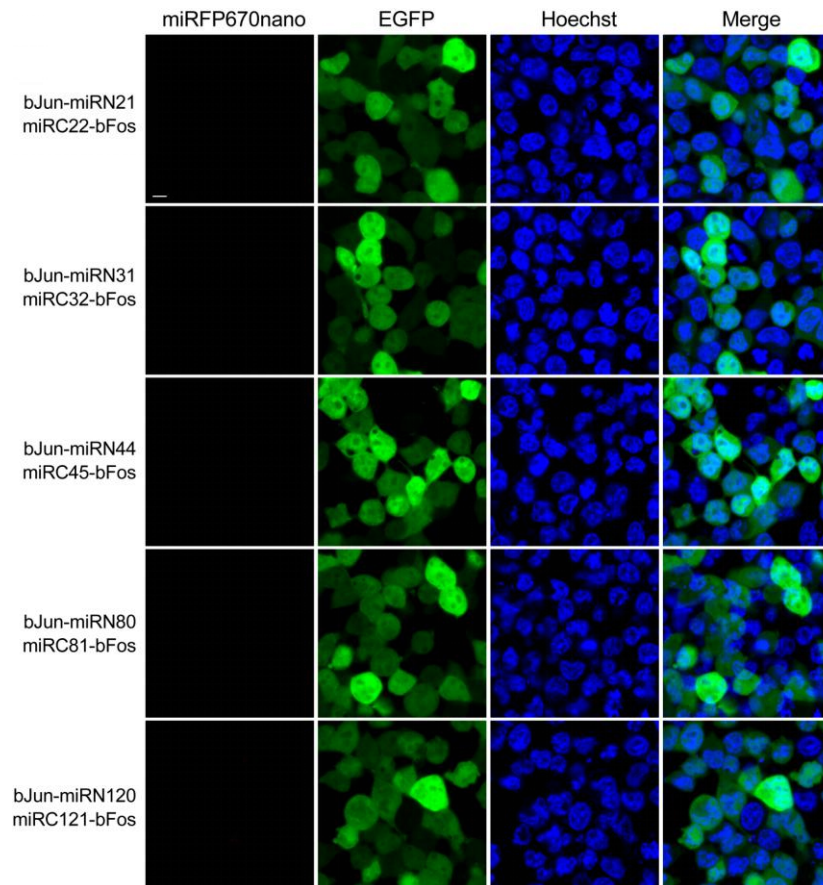

**Fig. S4.** No observable BiFC signal was detected when miRFP670nano was split into fragments at other five split sites. Nuclei were stained with Hoechst 33342. Scale bar: 10  $\mu$ m.

bJun-miRN107 (591 bp)

```
ATGAAGGCGGAGAGGAAGCGCATGAGAAAACCGCATCGCTGCCTCCAAGTGC
CGGAAAAGGAAGCTGGAGCGGATCGCCCGGCTAGAGGAAAAAGTGAAAACC
TTGAAAGCGCAAAACTCCGAGCTGGCGTCCACGGCCAACATGCTCAGGGAA
CAGGTGGCACAGCTTAAACAGAAAGTCATGAACCACGTTAACAGTGGGTGCC
AACTCATGCTAACGCAGCAGTTGCAAACGTTTGGAGGTGGCGGGAGTGGAG
GTGGCGGGAGTATGGCAAACCTGGACAAGATGCTGAATACCACAGTAACAGA
GGTGCGGCAGTTCCTGCAGGTGGACAGAGTGTGCGTGTTCAGTTTGGAGGA
GGATTATAGCGGAGTGGTGGTGGTGGAGGCCGTGGACGATAGGTGGATCTC
CATCCTGAAGACCCAGGTGCGGGATAGATACTTCATGGAGACAAGGGGCGAG
GAGTATTCTCACGGCCGCTACCAGGCCATCGCCGACATCTACACCGCAAACC
TGACAGAGTGCTACAGGGATCTGCTGACACAGTTTCAGGTGAGAGCAATCCT
GGCCGTGCCATCCTGCAGGGCTAA
```

miRC108-bFos (438 bp)

```
ATGAAGAAGCTGTGGGGCCTGTTGGTGGCACACCAGCTGGCGGCCCTAGA
CAGTGGCAGACCTGGGAGATCGACTTTCTGAAGCAGCAGGCCGTGGTGGTG
GGCATCGCCATCCAGCAGAGCGGAGGTGGCGGGAGTGGAGGTGGCGGGAG
TGGTCGTGCGCAGTCCATCGGTGCTGCGGGTAAAGTTGAACAACGTGCCCGG
GAAGAGGAAGAGAAAACGTCGCATCCGCCGTGAACGTAACAAAATGGCGGCA
GCGAAATGCCGTAACCGCCGTCGTGAACTGACCGACACCCTGCAGGCCGAA
ACCGACCAGCTGGAAGACGAAAAATCCGCGCTGCAAACCGAAATCGCGAAC
CTGCTGAAAGAAAAAGAAAAGCTGGAGTTCATCCTGGCGGCACACCGTCCG
CGTGCAAATCCCGAACGACCTGGGTAA
```

**Fig. S5.** The gene sequences for the new constructs of miRFP670nano-BiFC system.

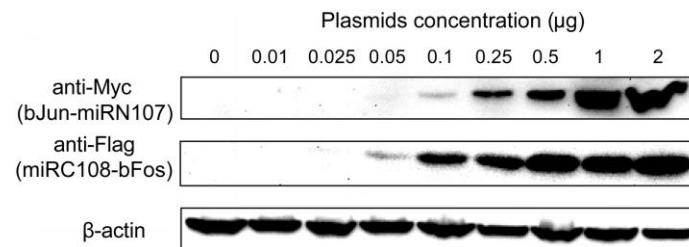

**Fig. S6.** The corresponding protein expression in Fig. 1f was determined by western blotting with anti-Myc or anti-Flag antibody. beta-actin was used as the loading control.

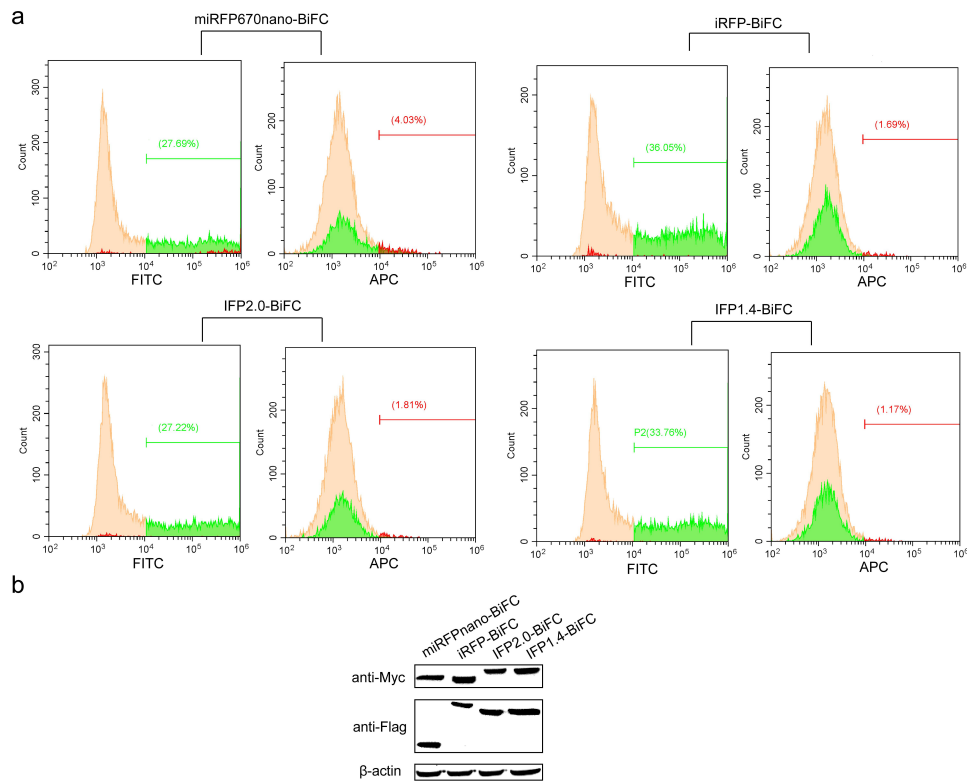

**Fig. S7.** Characterizing the maturation of miRFP670nano-BiFC and the reported near-infrared BiFC systems in living cells. (a) Different near-infrared BiFC systems were analyzed with flow cytometry in HEK 293T cells. EGFP was co-expressed in the cells as an internal control. EGFP fluorescence was detected by FITC channel and reconstructed near-infrared fluorescence was detected by APC channel. This experiment was repeated three times. (b) Expression of different near-infrared BiFC systems fusion proteins was determined by western blotting with anti-Myc or anti-Flag antibody.  $\beta$ -actin was used as the loading control. The N-terminal split fragments of different near-infrared BiFC systems were fused with Myc tag, and the C-terminal split fragments of different near-infrared BiFC systems were fused with Flag tag.

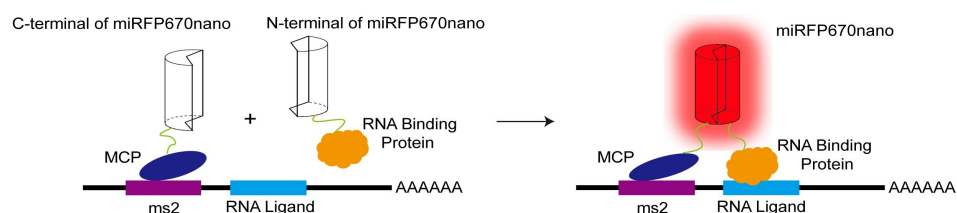

**Fig. S8.** The Schematic illustration of the miRFP670nano-TriFC constructs. MCP: bacteriophage MS2 coat protein; ms2: stem-loop RNA operator. The two fragments of miRFP670nano could come together and reconstitute to produce a TriFC signal based on the RNA binding protein/RNA ligand interaction.

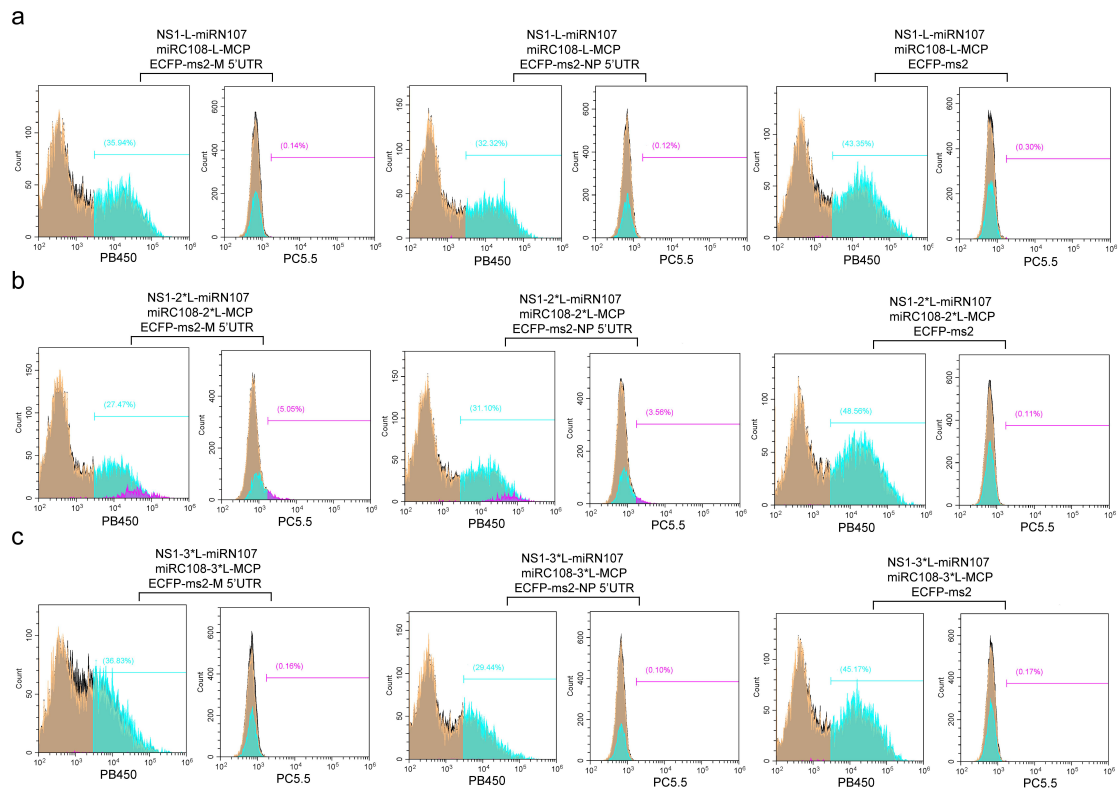

**Fig. S9.** Flow cytometry analysis was carried out to characterize the miRFP670nano-TriFC systems for imaging RNA-protein interaction in living cells. (a) The miRFP670nano-TriFC system with “L” as the linker was analyzed with flow cytometry in HEK 293T cells. (b) The miRFP670nano-TriFC system with “2\*L” as the linker was analyzed with flow cytometry in HEK 293T cells. (c) The miRFP670nano-TriFC system with “3\*L” as the linker was analyzed with flow cytometry in HEK 293T cells. ECFP fluorescence was detected by PB450 channel and miRFP670nano fluorescence was detected by PC5.5 channel. This experiment was repeated three times.

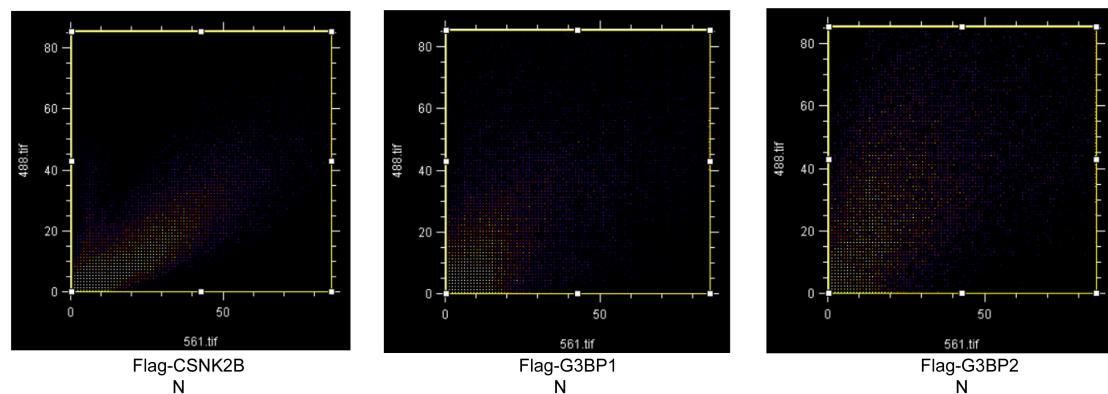

**Fig. S10.** The co-localization analysis of cellular stress granule proteins with N protein. The 488 channel represents the Flag-tagged cellular stress granule proteins, and 561 channel represents the N protein.

**Table S1.** The information of the split fragments of miRFP670nano to develop the BiFC assay.

| Split sites | N-terminal split reporter | C-terminal split reporter |
|-------------|---------------------------|---------------------------|
| 21-22       | miRN21                    | miRC22                    |
| 31-32       | miRN31                    | miRC32                    |
| 44-45       | miRN44                    | miRC45                    |
| 80-81       | miRN80                    | miRC81                    |
| 107-108     | miRN107                   | miRC108                   |
| 120-121     | miRN120                   | miRC121                   |



**Table S2.** Properties of the newly developed miRFP670nano-BiFC system compared with native miRFP670nano.

| Name                  | Ex<br>(nm) | Em<br>(nm) | Extinction<br>coefficient<br>(M <sup>-1</sup> cm <sup>-1</sup> ) | Quantum yield<br>(%) | Brightness in mammalian cells<br>vs miRFP670nano (%) | Ref.         |
|-----------------------|------------|------------|------------------------------------------------------------------|----------------------|------------------------------------------------------|--------------|
| miRFP670nano          | 645        | 670        | 95000                                                            | 10.8                 | 100                                                  | 1            |
| miRFP670nano<br>-BiFC | 647        | 674        | 41800                                                            | 6.3                  | 25                                                   | This<br>work |

**Table S3.** Sequences of primers used in this study

| Primers           | Sequences (5'-3')                                            |
|-------------------|--------------------------------------------------------------|
| bJun-NheI-F       | CTAGCTAGCGCCACCATGAAGGCGGAGAGGAAGCGCATG<br>AGAAACCGC         |
| Linker-1-R        | ACTCCCGCCACCTCCACTCCCGCCACCTCCAAACGTTTGC<br>AACTGCTGCGTTAG   |
| Linker-2-F        | GGAGGTGGCGGGAGTGGAGGTGGCGGGAGTATGGCAAAC<br>CTGGACAAGATGCTG   |
| miRN21-HindIII-R  | CCCAAGCTTTTACACCTGCAGGAACTGCCGCACCTC                         |
| miRC22-NheI-F     | CTAGCTAGCGCCACCATGGACAGAGTGTGCGTGTTCAGT<br>TTG               |
| Linker-3-R        | ACTCCCGCCACCTCCACTCCCGCCACCTCCGCTCTGCTGG<br>ATGGCGATGCCACCAC |
| Linker-4-F        | GGAGGTGGCGGGAGTGGAGGTGGCGGGAGTGGTCGTGCG<br>CAGTCCATCGGTCG    |
| bFos-HindIII-R    | CCCAAGCTTTTAACCCAGGTCGTTCGGGATTTTGCACGCC<br>GGACGG           |
| miRN31-HindIII-R  | CCCAAGCTTTTACTCCTCAAACCTGGAACACGCACAC                        |
| miRC32-NheI-F     | CTAGCTAGCGCCACCATGGATTATAGCGGAGTGGTGGTGG<br>TGGAGG           |
| miRN44-HindIII-R  | CCCAAGCTTTTAATCGTCCACGGCCTCCACCACCAC                         |
| miRC45-NheI-F     | CTAGCTAGCGCCACCATGAGGTGGATCTCCATCCTGAAGA<br>CC               |
| miRN80-HindIII-R  | CCCAAGCTTTTAGGTGTAGATGTTCGGCGATGGCCTG                        |
| miRC81-NheI-F     | CTAGCTAGCGCCACCATGGCAAACCTGACAGAGTGCTACA<br>GG               |
| miRN107-HindIII-R | CCCAAGCTTTTAGCCCTGCAGGATGGGCACGGCC                           |
| miRC108-NheI-F    | CTAGCTAGCGCCACCATGAAGAAGCTGTGGGGCCTGTTGG<br>TG               |
| miRN120-HindIII-R | CCCAAGCTTTTACGCCAGCTGGTGTGCCACCAACAG                         |
| miRC121-NheI-F    | CTAGCTAGCGCCACCATGGCCCCTAGACAGTGGCAGACCT<br>GG               |

---

|                       |                                                                                                         |
|-----------------------|---------------------------------------------------------------------------------------------------------|
| Flag-miRC108-1-NheI-F | CTAGCTAGCGCCACCATGGATTATAAAGATGACGACGATAA<br>AAAG                                                       |
| Flag-miRC108-2-F      | TTATAAAGATGACGACGATAAAAAGAAGCTGTGGGGCCTG<br>TTGGTG                                                      |
| miRN107-KpnI-F        | GGGGTACCATGGCAAACCTGGACAAGATGCTG                                                                        |
| miRN107-XbaI-R        | TGCTCTAGATTAGCCCTGCAGGATGGGCACGGCC                                                                      |
| miRC108-HindIII-R     | CCCAAGCTTGCTCTGCTGGATGGCGATGCCACCAC                                                                     |
| miRN107-2*L-KpnI-F    | GGGGTACCGGAGGTGGCGGGAGTGGAGGTGGCGGGAGTA<br>TGGCAAACCTGGACAAGATG                                         |
| miRC108-2*L-HindIII-R | CCCAAGCTTACTCCCGCCACCTCCACTCCCGCCACCTCCG<br>CTCTGCTGGATGGCGATGC                                         |
| miRN107-3*L-KpnI-F    | GGGGTACCGGAGGTGGCGGGAGTGGAGGTGGCGGGAGT<br>GGAGGTGGCGGGAGTGGAGGTGGCGGGAGTATGGCAAAC<br>CTGGACAAGATGCTG    |
| miRC108-3*L-HindIII-R | CCCAAGCTTACTCCCGCCACCTCCACTCCCGCCACCTCCA<br>CTCCCGCCACCTCCACTCCCGCCACCTCCGCTCTGCTGGA<br>TGCGGATGCCACCAC |
| CSNK2B-NheI-F         | CTAGCTAGCGCCACCATGAGCAGCTCAGAGGAGGTGTCCT<br>GGATTTC                                                     |
| CSNK2B-KpnI-R-1       | GGGGTACCGCGAATCGTCTTGACTGGGCTCTTGAAGTTGC<br>TGGCG                                                       |
| G3BP1-NheI-F          | CTAGCTAGCGCCACCATGGTGATGGAGAAGCCTAGTCCCC<br>TGC                                                         |
| G3BP1-HindIII-R-1     | CCCAAGCTTCTGCCGTGGCGCAAGCCCCCTTCCCCTC                                                                   |
| G3BP2-NheI-F          | CTAGCTAGCGCCACCATGGTTATGGAGAAGCCCAGTCCGC<br>TGC                                                         |
| G3BP2-KpnI-R-1        | GGGGTACCGCGACGCTGTCCTGTGAAGCGGCCCTCC                                                                    |
| Flag-CSNK2B-NheI-F    | CTAGCTAGCGCCACCATGGATTATAAAGATGACGACGATAA<br>AATGAGCAGCTCAGAGGAGGTGTCC                                  |
| CSNK2B-KpnI-R-2       | GGGGTACCTTAGCGAATCGTCTTGACTGGGCTCTTGAAG                                                                 |
| Flag-G3BP1-NheI-F     | CTAGCTAGCGCCACCATGGATTATAAAGATGACGACGATAA<br>AATGGTGATGGAGAAGCCTAGTCC                                   |
| G3BP1-HindIII-R-2     | CCCAAGCTTTTACTGCCGTGGCGCAAGCCCCCTTCC                                                                    |

---

---

|                    |                                                                        |
|--------------------|------------------------------------------------------------------------|
| Flag-G3BP2-NheI-F  | CTAGCTAGCGCCACCATGGATTATAAAGATGACGACGATAA<br>AATGGTTATGGAGAAGCCCAGTCCG |
| G3BP2-KpnI-R-2     | GGGGTACCTTAGCGACGCTGTCCTGTGAAGCGGCC                                    |
| CSNK2B-F           | CCTGGTTCTGTGGGCTCCGTGGCAATG                                            |
| CSNK2B-R           | CCATAAAGCATCTCGGCTGCCTGCTC                                             |
| G3BP1-F            | GGATCAAAGAGTGCGAGAACAACG                                               |
| G3BP1-R            | CTCCACCACGTTTCCATAACTTTG                                               |
| G3BP2-F            | GTTGGTAACTTGCCACATGATATTG                                              |
| G3BP2-R            | CACATTTAAACGTACTTCCCCTCG                                               |
| GAPDH-F            | AGAAGGCTGGGGCTCATTG                                                    |
| GAPDH-R            | AGGGGCCATCCACAGTCTTC                                                   |
| N-BamHI-F          | CGGGATCCATGTCTGATAATGGACCCCAAATCAG                                     |
| N-NotI-R           | ATTTGCGGCCGCTTAGGCCTGAGTTGAGTCAGCACTGCTC<br>ATGG                       |
| N(1-246)-NotI-R    | ATTTGCGGCCGCTTAGACAGTTTGGCCTTGTTGTTGTTGGC<br>C                         |
| N(247-419)-BamHI-F | CGGGATCCATGACTAAGAAATCTGCTGCTGAGGCTTCTAA<br>G                          |
| Myc-bJun-NheI-F    | CTAGCTAGCGCCACCATGGAGCAGAACTCATCTCTGAAG<br>AGGATCTGATGAAGGC            |
| bJun-2-F           | CTCATCTCTGAAGAGGATCTGATGAAGGCGGAGAGGAAG<br>CGCATGAGAAAC                |
| bJun-R             | ACTCCCGCCACCTCCACTCCCGCCACCTCCAAACGTTTGC<br>AACTGCTGCGTTAG             |
| miRN107-F          | GGAGGTGGCGGGAGTGGAGGTGGCGGGAGTATGGCAAAC<br>CTGGACAAGATGCTG             |
| miRN107-HindIII-R  | CCCAAGCTTTTAGCCCTGCAGGATGGGCACGGCC                                     |
| iRN97-F            | GGAGGTGGCGGGAGTGGAGGTGGCGGGAGTATGGCTGAA<br>GGATCCGTCGCCAGGC            |
| iRN97-HindIII-R    | CCCAAGCTTTTACATCGTGAAGCCGACAGTGATCGGTGCT<br>C                          |

---

---

|                               |                                                                |
|-------------------------------|----------------------------------------------------------------|
| IFP2.0-IFN132-F               | GGAGGTGGCGGGAGTGGAGGTGGCGGGAGTATGGCTCGG<br>GACCCTCAACCTTTC     |
| IFP2.0-IFN132-HindIII-R       | CCCAAGCTTTTACCATGCCTCAGTAGGCTCGAATTCCAG                        |
| IFP1.4-IFN132-F               | GGAGGTGGCGGGAGTGGAGGTGGCGGGAGTATGGCTCGG<br>GACCCTCTGCCATTCTTTC |
| IFP1.4-IFN132-HindIII-R       | CCCAAGCTTTTACCAGGCCTCGGTAGGTTCGAACTCCAGG<br>ATC                |
| Flag-iRC98-NheI-F             | CTAGCTAGCGCCACCATGGATTATAAAGATGACGACGATAA<br>ACG               |
| iRC98-2-F                     | GATTATAAAGATGACGACGATAAACGAAAGGACGCAGGCT<br>TCATCGGCTCC        |
| iRC98-R                       | ACTCCCGCCACCTCCACTCCCGCCACCTCCCTCTTCCATCA<br>CGCCGATCTGCCAGG   |
| bFos-F                        | GGAGGTGGCGGGAGTGGAGGTGGCGGGAGTGGTTCGTGCG<br>CAGTCCATCGGTTCG    |
| bFos-HindIII-R                | CCCAAGCTTTTAACCCAGGTCGTTCGGGATTTTGCACGCC<br>GGACGG             |
| Flag-IFP2.0-IFC133-NheI-<br>F | CTAGCTAGCGCCACCATGGATTATAAAGATGACGACGATAA<br>AGAC              |
| IFP2.0-IFC133-2-F             | GATTATAAAGATGACGACGATAAAGACTCTATTGGACCCC<br>ACGCTCTGAG         |
| IFP2.0-IFC133-R               | ACTCCCGCCACCTCCACTCCCGCCACCTCCGGCTTCTTTC<br>TCTGCACCTGCAGGG    |
| Flag-IFP1.4-IFC133-NheI-<br>F | CTAGCTAGCGCCACCATGGATTATAAAGATGACGACGATAA<br>AGAC              |
| IFP1.4-IFC133-2-F             | GATTATAAAGATGACGACGATAAAGACAGCATTGGCCCTC<br>ACGCCCTGAG         |
| IFP1.4-IFC133-R               | ACTCCCGCCACCTCCACTCCCGCCACCTCCTTTATACAGCT<br>CGTCCATTCCGGC     |
| His-miRFP670nano-NheI-<br>F   | CTAGCTAGCGCCACCATGCACCACCACCACCACCACCACC<br>ACATGGCAAACCTGGAC  |
| His-miRFP670nano-2-F          | CACCACCACCACCACCACATGGCAAACCTGGACAAGATG<br>CTGAATACC           |
| miRFP670nano-HindIII-R        | CCCAAGCTTTTAGCTCTGCTGGATGGCGATGCCACCAC                         |

---

---

|                    |                                                            |
|--------------------|------------------------------------------------------------|
| His-bJun-NheI-F    | CTAGCTAGCGCCACCATGCACCACCACCACCACCACCACC<br>ACAAGGCGGAGAG  |
| His-bJun-2-F       | CACCACCACCACCACCACCACCACAAGGCGGAGAGGAAG<br>CGCATGAGAAAC    |
| His-miRC108-NheI-F | CTAGCTAGCGCCACCATGCACCACCACCACCACCACCACC<br>ACAAGAAGCTGTGG |
| His-miRC108-2-F    | CACCACCACCACCACCACCACCACAAGAAGCTGTGGGGC<br>CTGTTGGTG       |

---

Forward primer; R, Reverse primer

1. O. S. Oliinyk, A. A. Shemetov, S. Pletnev, D. M. Shcherbakova and V. V. Verkhusha, *Nat Commun*, 2019, **10**, 279.
